# Supplementary material
Source: PubMed Central journal article supplement (PMC7007197)
Supplement: cs9b01266_si_001.pdf [file cs9b01266_si_001.pdf]

## SUPPORTING INFORMATION

# Unexpected Roles of a Tether Harboring a Tyrosine Gatekeeper Residue in Modular Nitrite Reductase Catalysis

Tobias M. Hedison<sup>1</sup>, Rajesh Shenoy<sup>2</sup>, Andreea I. Iorgu<sup>1</sup>, Derren J. Heyes<sup>1</sup>, Karl Fisher<sup>1</sup>, Gareth S. A. Wright<sup>2</sup>, Sam Hay<sup>1</sup>, Robert R. Eady<sup>2</sup>, Svetlana V. Antonyuk<sup>2</sup>, S. Samar Hasnain<sup>2\*</sup>, Nigel S. Scrutton<sup>1\*</sup>

<sup>1</sup>Manchester Institute of Biotechnology and School of Chemistry, Faculty of Science and Engineering, The University of Manchester, 131 Princess Street, Manchester M1 7DN, United Kingdom

<sup>2</sup>Institute of Integrative Biology, Faculty of Health and Life Sciences, University of Liverpool, Liverpool L69 7ZB, United Kingdom

\*Corresponding authors:

Nigel Scrutton, email: [nigel.scrutton@manchester.ac.uk](mailto:nigel.scrutton@manchester.ac.uk), and Samar Hasnain, email: [s.s.hasnain@liverpool.ac.uk](mailto:s.s.hasnain@liverpool.ac.uk)

## Table of Contents

|                                                                                                                                                                                                                 |     |
|-----------------------------------------------------------------------------------------------------------------------------------------------------------------------------------------------------------------|-----|
| Design of Deconstructed <i>Ralstonia Pickettii</i> Copper Containing Nitrite Reductase Constructs.....                                                                                                          | S2  |
| Spectroscopic Properties of <i>Ralstonia Pickettii</i> Copper Containing Nitrite Reductase Constructs .....                                                                                                     | S3  |
| ‘Compactness’ of the <i>RpNiR</i> -Core Trimer .....                                                                                                                                                            | S4  |
| Details of T2Cu Nitrite Bound Sites .....                                                                                                                                                                       | S5  |
| Active Site of the ‘As-Isolated’ Y323F Full-Length <i>Ralstonia Pickettii</i> Copper Containing Nitrite Reductase Variant.....                                                                                  | S6  |
| Determination of Reduction Potentials of Copper and Haem Centres in <i>Ralstonia Pickettii</i> and <i>Achromobacter xylosoxidans</i> Copper Containing Nitrite Reductase and Cytochrome <i>c</i> Proteins ..... | S7  |
| Inter- and Intra-Protein Electron Transfer from Haem to the T1Cu in Copper Nitrite Reductases.....                                                                                                              | S11 |
| SAXS Data From the Full-Length <i>RpNiR</i> in Solution.....                                                                                                                                                    | S12 |
| Inter Copper Electron Transfer In The <i>Ralstonia Pickettii</i> Copper Containing Nitrite Reductase Core Proteins.....                                                                                         | S13 |
| Nitrite Affinity in the 1-Electron Reduced State of <i>Ralstonia Pickettii</i> Copper Containing Nitrite Reductase .....                                                                                        | S13 |
| Kinetic Model Suggesting Third Site Reactivity in <i>Ralstonia Pickettii</i> Copper Containing Nitrite Reductase.....                                                                                           | S14 |
| References.....                                                                                                                                                                                                 | S15 |

## Design of Deconstructed *Ralstonia Pickettii* Copper Containing Nitrite Reductase Constructs

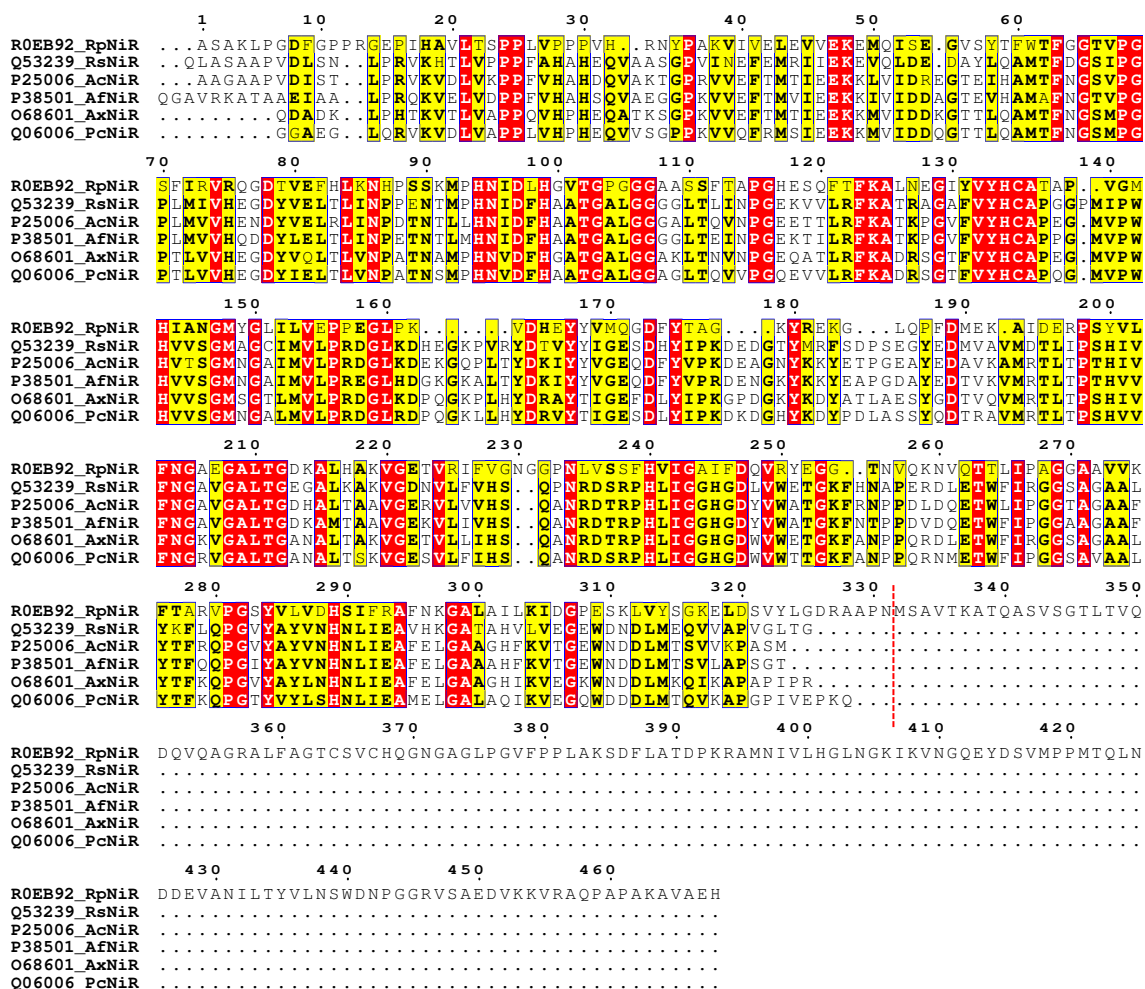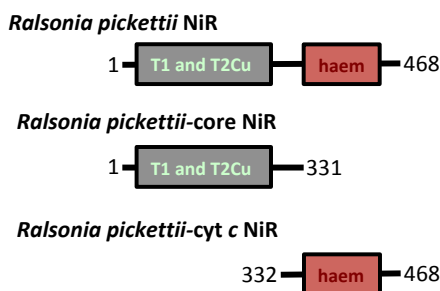

**Figure S1. Multiple sequence alignment of selected 2-domain copper containing nitrite reductases with *Ralstonia pickettii* copper nitrite reductase and design of synthetic components. Top) Sequence alignment.** Residues highlighted in red are conserved among all selected CuNiRs, while those highlighted in yellow are only partially conserved/sharing similar physico-chemical properties. The multiple sequence alignment was performed using the Clustal Omega web server, and the alignment file was rendered using the ENDscript server.<sup>1</sup> Each line on the first column of the figure is showing the Uniprot accession code followed by the shorthand name of each copper containing nitrite reductase. All N-terminal leader sequences, which are cleaved in the periplasmic space to produce the mature CuNiR proteins, have been omitted from the sequence alignment for simplicity. **Bottom)** A schematic of the full-length and deconstructed *RpNiR* protein. The *RpNiR* protein (top of schematic) is numbered from the N-terminus to the C-terminus and excludes the N-terminal leader sequence (residues 1-31), which is cleaved to produce the mature protein after *RpNiR* is directed to the periplasmic space. The *RpNiR* core protein (middle of schematic) and the *RpNiR* cytochrome *c* protein (bottom of schematic) are numbered in relation to the mature full-length *RpNiR* enzyme. In the schematic, the core portion is shown as a grey rectangle and the cytochrome *c* domain is shown as a red square.

## Spectroscopic Properties of *Ralstonia Pickettii* Copper Containing Nitrite Reductase Constructs

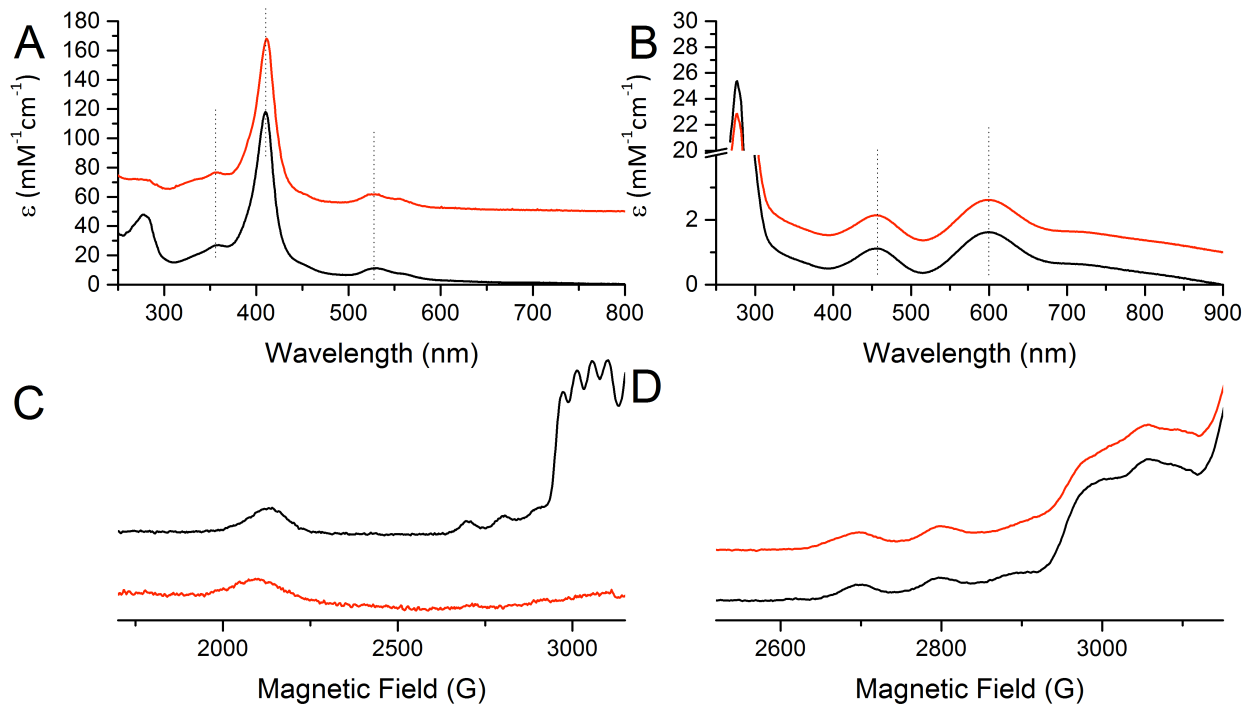

**Figure S2. UV-Vis and EPR spectroscopic properties of the different *Ralstonia pickettii* CuNiR constructs used in this investigation.** **A)** UV-Vis spectra of oxidised wild-type (black) and cytochrome *c* (red) *RpNiR* constructs. **B)** UV-Vis spectra of the oxidised *RpNiR*-core (black) and Y323F *RpNiR*-core (red) constructs. In A) and B), spectra have been shifted on the *y*-axis for a clear comparison between the different *RpNiR* constructs. In A), the *RpNiR* cytochrome *c* spectra has been shifted by a factor of +50 mM<sup>-1</sup>cm<sup>-1</sup>, while in B), the Y323F *RpNiR*-core has been shifted by a factor of 1 mM<sup>-1</sup>cm<sup>-1</sup>, respectively. **C)** EPR spectra of oxidised wild-type (black) and cytochrome *c* (red) *RpNiR* constructs. **D)** EPR spectra of oxidised *RpNiR*-core (black) and Y323F *RpNiR*-core (red) constructs. All UV-Vis measurements were performed in 50 mM potassium phosphate buffer (pH 7.0), at 25 °C. All EPR measurements were performed in 50 mM potassium phosphate buffer (pH 7.0) with 80-130  $\mu$ M protein samples. EPR measurements were performed at 20 K on a Bruker EMX X-band EPR spectrometer. The microwave power was 0.5 mW, the modulation frequency 100 kHz, and the modulation amplitude 5 G.

### 'Compactness' of the *RpNiR*-Core Trimer

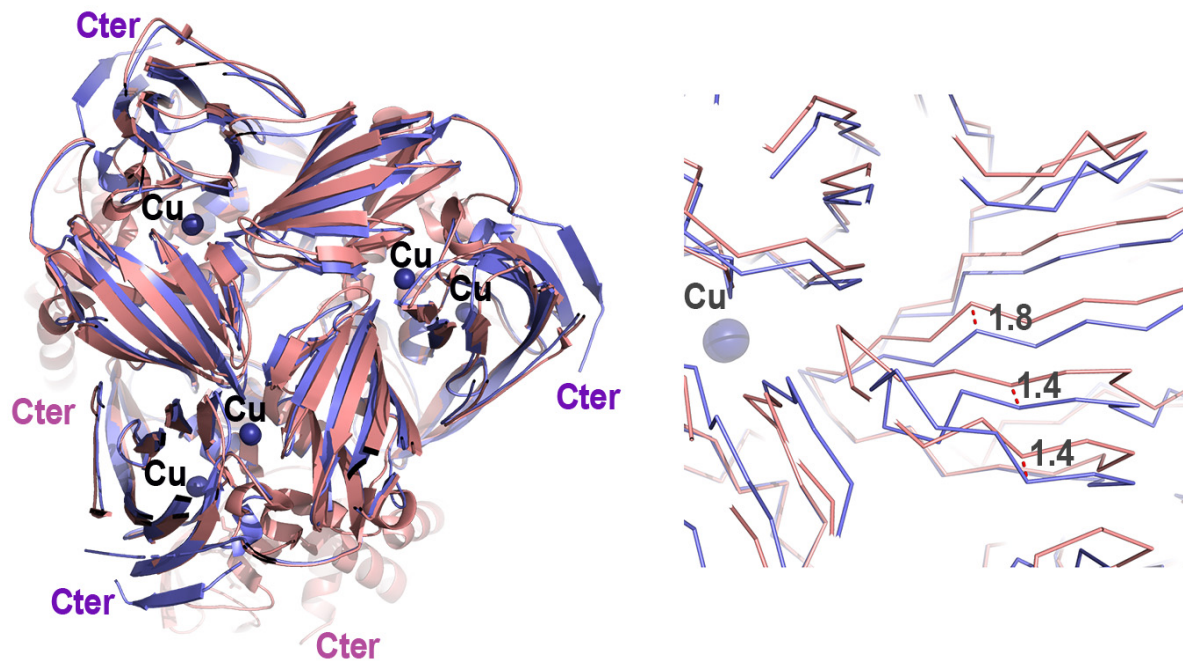

**Figure S3. Structural alignment of the *RpNiR*-core and the full-length *RpNiR* (PDB ID: 3ZIY) trimers. Left)** The displayed alignment shows an increase in compactness of the *RpNiR*-core (lilac) when compared with the full-length *RpNiR* trimer (salmon). **Right)** A zoomed section of the structural alignment showing the average inward movement of  $\sim 1.6$  Å of the *RpNiR*-core β-strands when compared to the full-length *RpNiR*. Copper ions (Cu) are shown as dark blue spheres and the visible C-terminals of full-length and core *RpNiR* proteins are denoted by C-ter.

## Details of T2Cu Nitrite Bound Sites

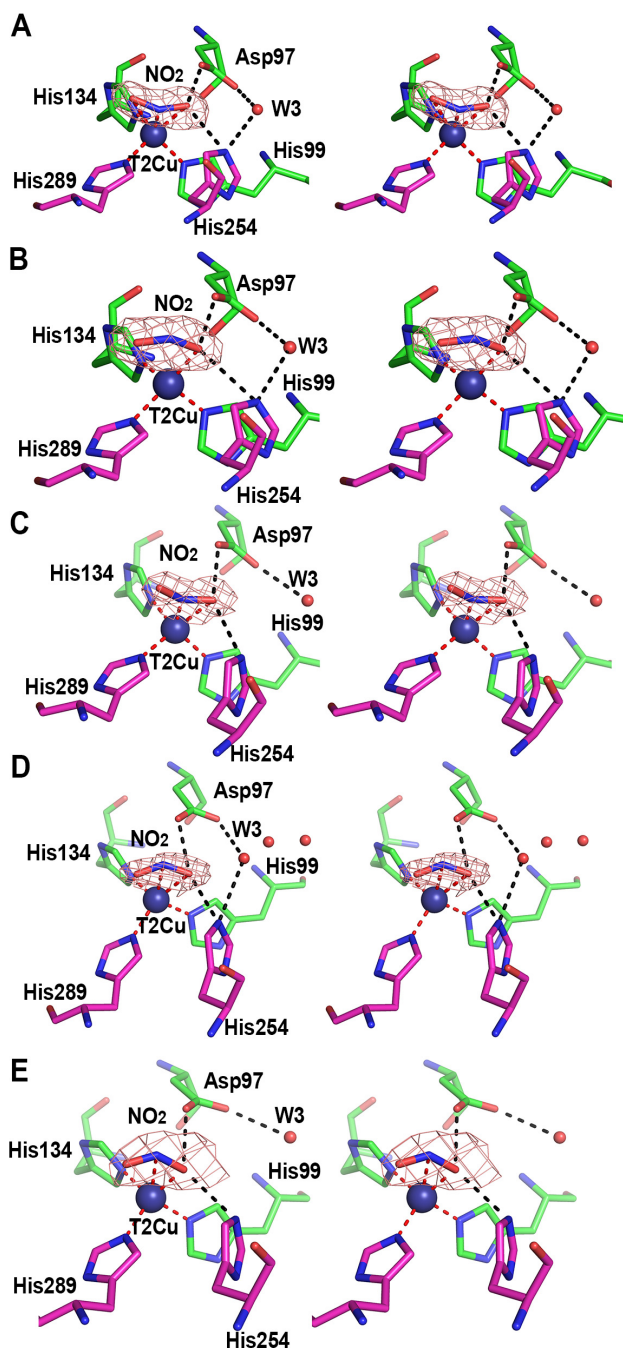

**Figure S4. Details of nitrite binding in stereo view. A)** *RpNiR*-core molecules B and C showing nitrite bound in a “top-hat” configuration. **B)** *RpNiR*-core molecules D and F showing nitrite bound in a “side-on” configuration. **C)** The full-length *RpNiR* Y323A variant showing nitrite bound in “reverse-hat” configuration. **D)** The full-length *RpNiR* Y323E variant showing nitrite bound in a “side-on” configuration. **E)** The full-length *RpNiR* Y323F variant showing nitrite bound in a “side-on” configuration. An omit  $F_o - F_c$  electron density map is contoured at  $5\sigma$  level around nitrite molecules. Residues from different CuNiR monomeric units are colored according to chains. T2Cu centres are shown as deep blue spheres, coordination bonds are shown as red dashed lines and hydrogen bonds as black dashed lines.





**Determination of Reduction Potentials of Copper and Haem Centres in *Ralstonia Pickettii* and *Achromobacter xylosoxidans* Copper Containing Nitrite Reductase and Cytochrome *c* Proteins**

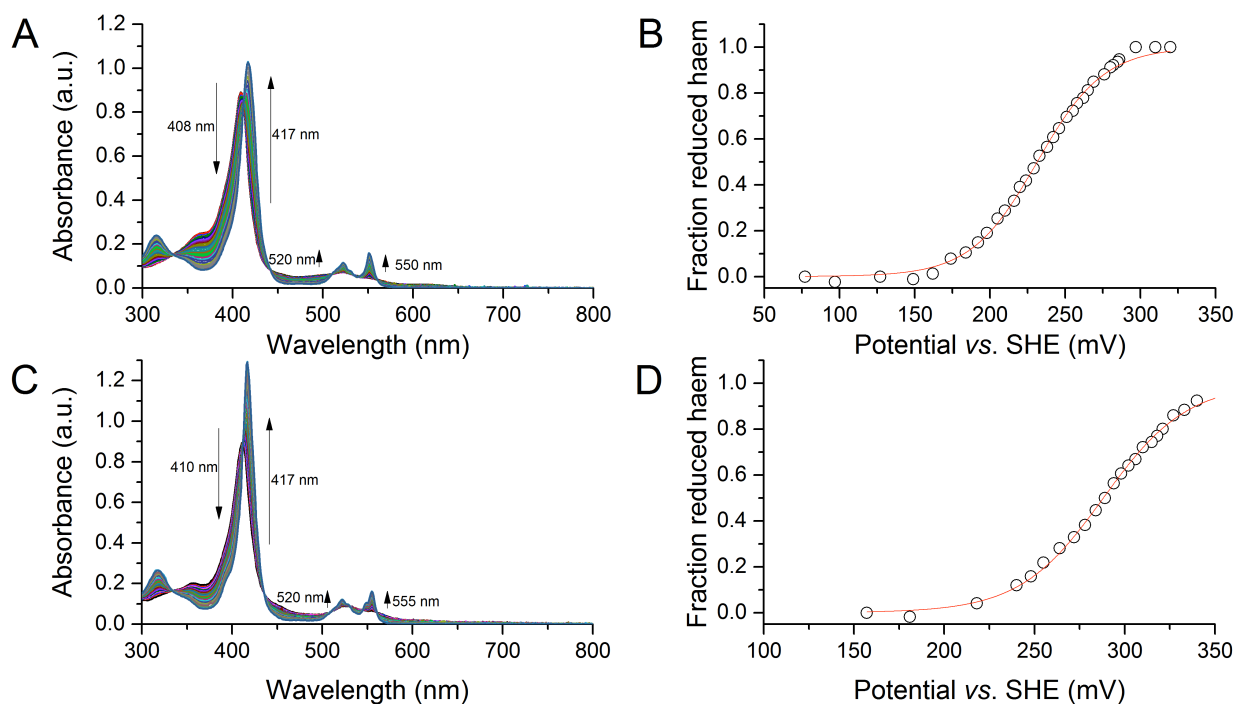

**Figure S6. Determination of haem redox potential in *Alcaligenes xylosoxidans* cytochrome  $c_{551}$  and the constituent *Ralstonia pickettii* CuNiR *cyt c* protein.** **A)** UV-Vis spectra changes of *Axcyt*  $c_{551}$  during reduction with sodium dithionite. **B)** Fraction of the *Axcyt*  $c_{551}$  Haem reduction as a function of potential. **C)** UV-Vis spectra changes of *RpNiR* *cyt c* during reduction with sodium dithionite. **D)** Fraction of the *RpNiR* *cyt c* haem reduction as a function of potential. The data in B (black circles) are fit to the Nernst equation (Eq. 4 in main manuscript; red line). Measurements were performed in 50 mM potassium phosphate buffer (pH 7.0), at 25 °C, with 7.5  $\mu$ M *Axcyt*  $c_{551}$ /*RpNiR* *cyt c*. The  $n$  values determined from the Nernst equation are  $1.0 \pm 0.1$  and  $1.1 \pm 0.1$  for the haem cofactors present in *Axcyt*  $c_{551}$  and in *RpNiR* *cyt c* proteins, respectively.

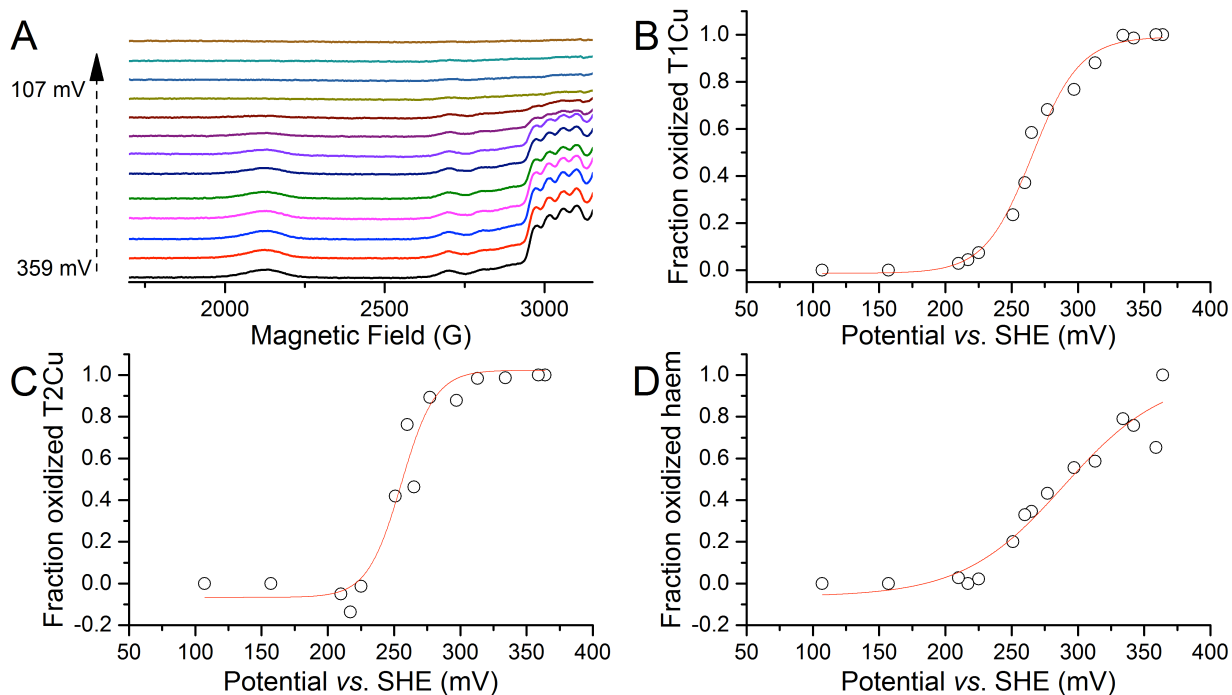

**Figure S7. Determination of T1Cu, T2Cu and haem redox potential in *Ralstonia pickettii* CuNiR.** **A)** EPR spectral changes of the *RpNiR* T1Cu, T2Cu and the haem during reduction with sodium dithionite. **B)** Fraction of the *RpNiR* T1Cu reduction as a function of potential. **C)** Fraction of the *RpNiR* T2Cu reduction as a function of potential. **D)** Fraction of the *RpNiR* haem reduction as a function of potential. The data in B, C and D (black circles) are fit to the Nernst equation (Eq. 4 in main manuscript; red line). All measurements were performed with *ca* 100  $\mu$ M protein samples in 50 mM potassium phosphate buffer (pH 7.0), at 25  $^{\circ}$ C, which were frozen in liquid  $N_2$  prior to EPR analysis. EPR spectra were recorded at 20 K on a Bruker EMX X-band EPR spectrometer. The microwave power was 0.5 mW, the modulation frequency 100 kHz, and the modulation amplitude 5 G. The  $n$  values determined from the Nernst equation are  $0.7 \pm 0.2$ ,  $1.5 \pm 0.2$  and  $1.4 \pm 0.2$  for the haem, T1 and T2Cu centres present in the full-length *RpNiR* protein, respectively.



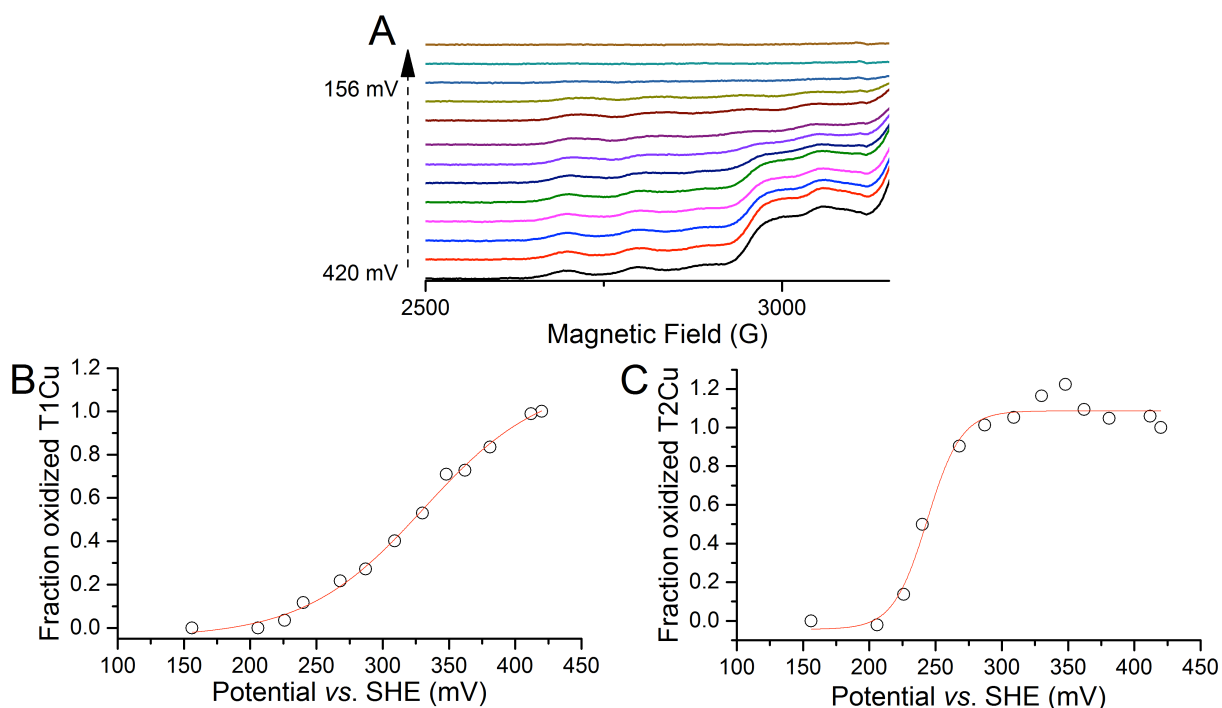

**Figure S8. Determination of T1Cu and T2Cu redox potential in *Ralstonia pickettii* CuNiR-core.** **A)** EPR spectral changes of the *RpNiR* core1 T1Cu and T2Cu during reduction with sodium dithionite. **B)** Fraction of the *RpNiR* T1Cu reduction as a function of potential. **C)** Fraction of the *RpNiR* T2Cu reduction as a function of potential. The data in B and C (black circles) are fit to the Nernst equation (Eq. 4 in main manuscript; red line). All measurements were performed with *ca* 100  $\mu$ M protein samples in 50 mM potassium phosphate buffer (pH 7.0), at 25  $^{\circ}$ C, which were frozen in liquid  $N_2$  prior to EPR analysis. EPR spectra were recorded at 20 K on a Bruker EMX X-band EPR spectrometer. The microwave power was 0.5 mW, the modulation frequency 100 kHz, and the modulation amplitude 5 G. The  $n$  values determined from the Nernst equation are  $0.6 \pm 0.2$  and  $1.2 \pm 0.1$  for the T1 and T2Cu centres present in the *RpNiR*-core protein, respectively.

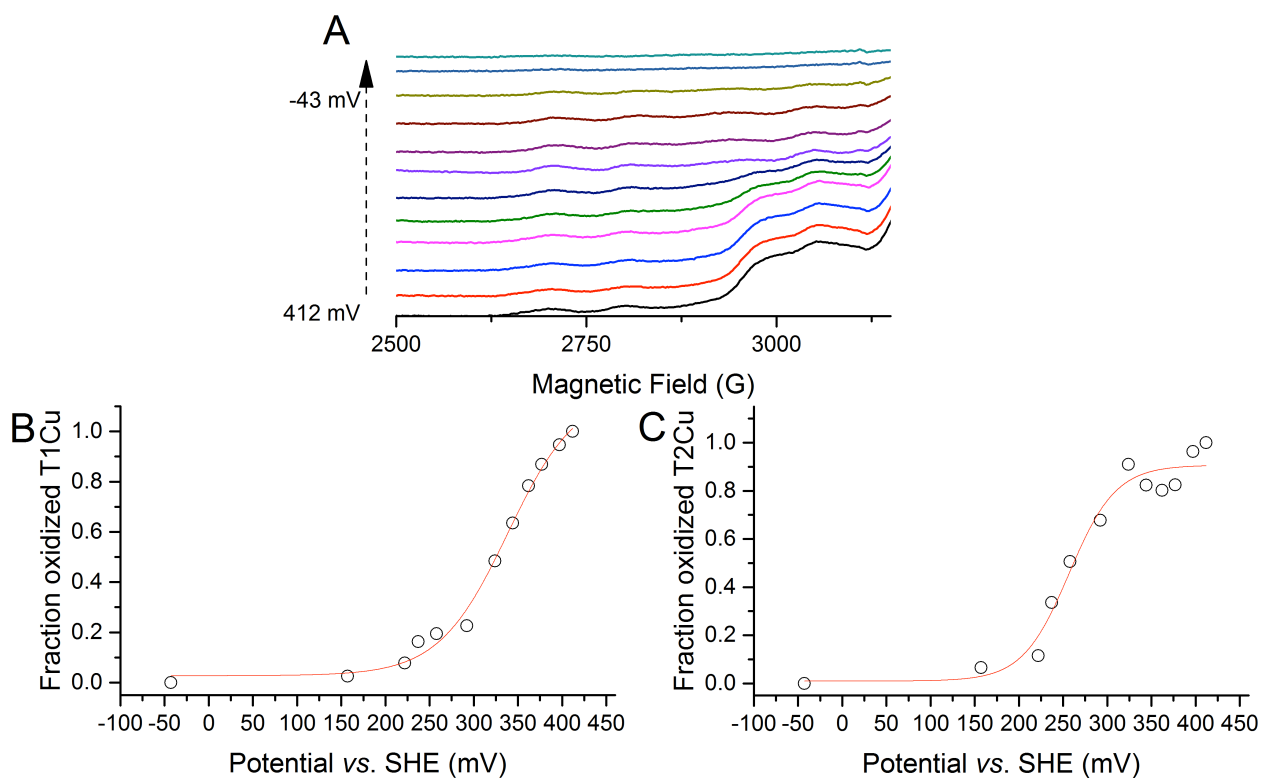

**Figure S9. Determination of T1Cu and T2Cu redox potential in Y323F *Ralstonia pickettii* CuNiR-core variant.** **A)** EPR spectral changes of the Y323F *RpNiR*-core T1Cu and T2Cu during reduction with sodium dithionite. **B)** Fraction of the *RpNiR* T1Cu reduction as a function of potential. **C)** Fraction of the *RpNiR* T2Cu reduction as a function of potential. The data in B and C (black circles) are fit to the Nernst equation (Eq. 4 in main manuscript; red line). All measurements were performed with *ca* 100  $\mu$ M protein samples in 50 mM potassium phosphate buffer (pH 7.0), at 25  $^{\circ}$ C, which were frozen in liquid N<sub>2</sub> prior to EPR analysis. EPR spectra were recorded at 20 K on a Bruker EMX X-band EPR spectrometer. The microwave power was 0.5 mW, the modulation frequency 100 kHz, and the modulation amplitude 5 G. The *n* values determined from the Nernst equation are  $0.7 \pm 0.2$  and  $1.0 \pm 0.3$  for the T1 and T2Cu centres present in the Y323F *RpNiR*-core protein, respectively.

## Inter- and Intra-Protein Electron Transfer from Haem to the T1Cu in Copper Nitrite Reductases

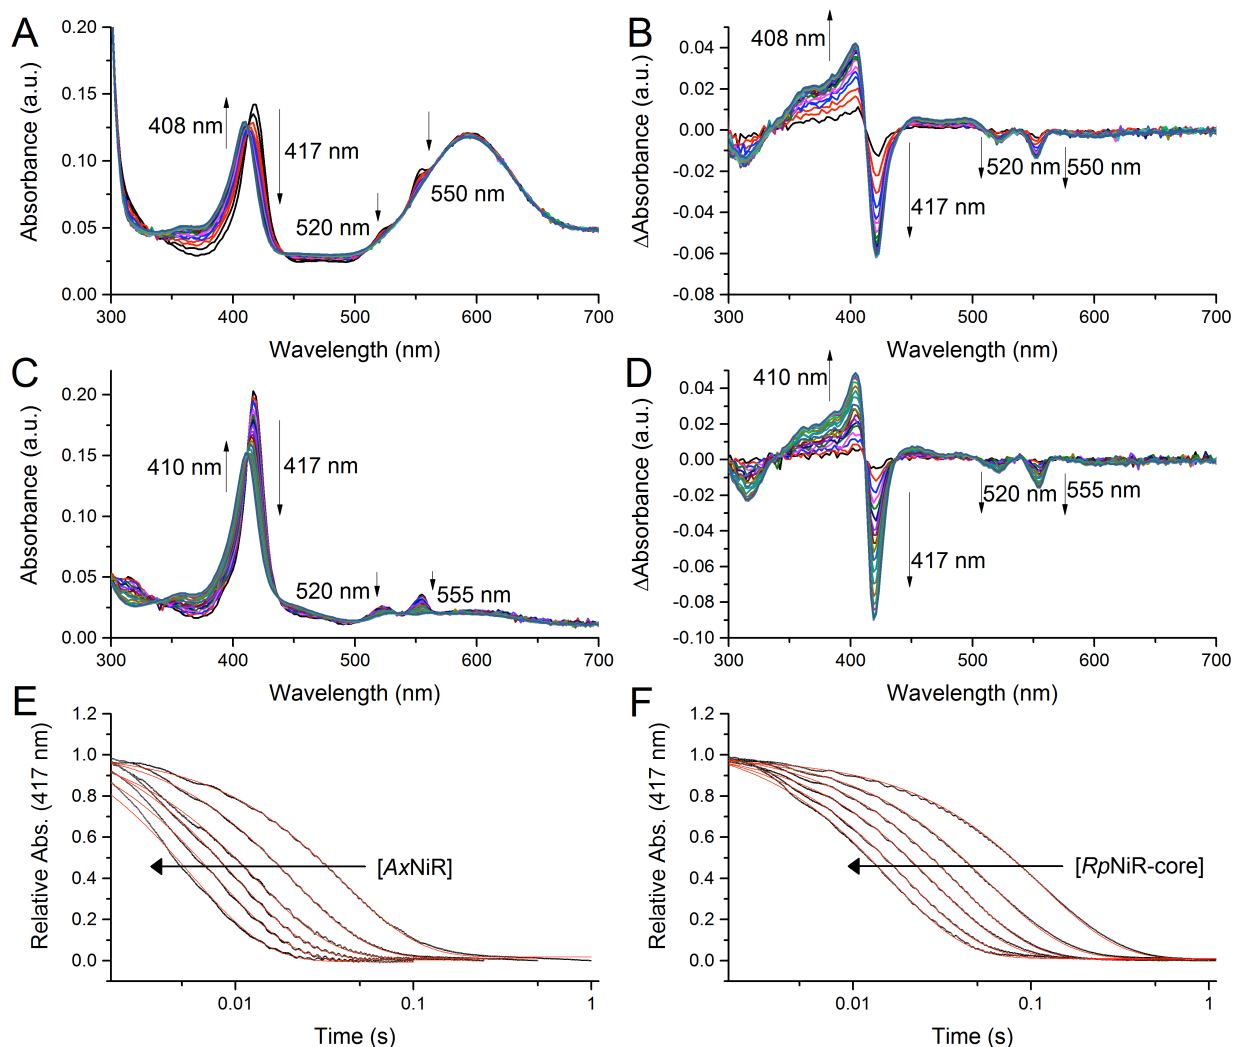

**Figure S10. Photodiode array (PDA) spectra and example stopped-flow transients for the reaction between reduced *Axcyt*  $C_{551}$  and oxidised *AxNiR*.** **A)** Raw PDA spectra showing UV-Vis changes for the reaction between reduced *Axcyt*  $C_{551}$  and oxidised *AxNiR*. **B)** Absorbance difference spectra, relative to the spectrum at 5 ms, derived from data in A. **C)** Raw PDA spectra showing UV-Vis changes for the reaction between reduced *Axcyt*  $C_{551}$  and oxidised *AxNiR*. **D)** Absorbance difference spectra, relative to the spectrum at 5 ms, derived from data in C. **E)** Example stopped-flow transients and corresponding single exponential fits for the reaction between *AxNiR* and *Axcyt*  $C_{551}$ . **F)** Example stopped-flow transients and corresponding single exponential fits for the reaction between the *RpNiR*-core and the *RpNiR* *cyt c* protein. Conditions: 1  $\mu$ M *Axcyt*  $C_{551}$  (final concentration) mixed with 10-80  $\mu$ M oxidised *AxNiR* (final concentration) in 50 mM potassium phosphate buffer (pH 7.0), 50 mM potassium chloride, at 10 °C. For PDA experiments, 20  $\mu$ M oxidised NiR protein was used and data was recorded over a 1 s timeframe.

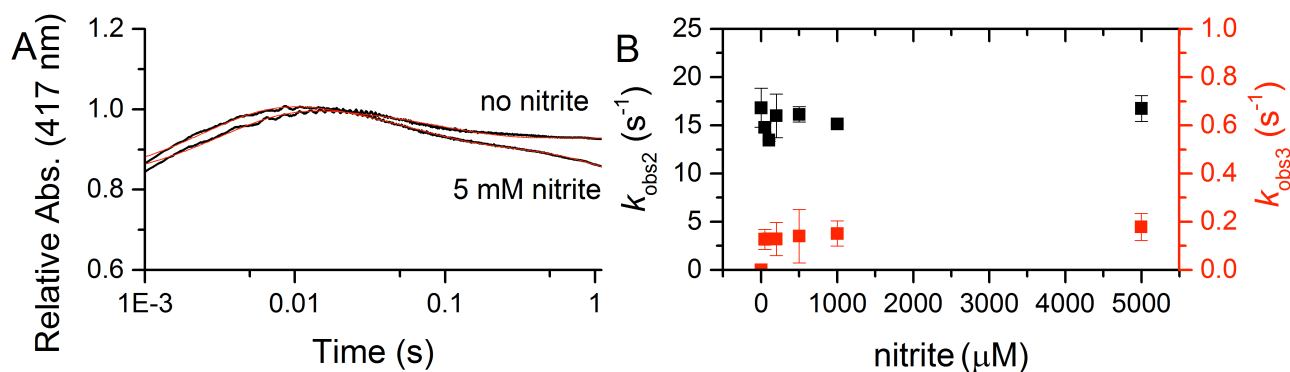

**Figure S11. Laser flash photolysis method to monitor Haem to T1Cu electron transfer in *Ralstonia pickettii* copper containing nitrite reductase. A)** Example transients (black) and the corresponding exponential fits (red) for the laser flash photolysis assay used to monitor haem to T1Cu electron transfer. With no nitrite present, only one kinetic phase is observed in the haem to T1Cu electron transfer reaction (shown by a single exponential for the decrease in absorbance at 417 nm in absence of nitrite in A.). Conversely, when nitrite is present, there is an additional kinetic phase observed with a slow rate constant (shown as a double exponential for the decrease in absorbance at 417 nm in presence of nitrite in A.) that is similar to the steady state rate of turnover per *RpNiR* trimer (see Figure 5). **B)** Nitrite dependence on the rate of haem to T1Cu electron transfer in *RpNiR*. Measurements were performed on 17 μM of *RpNiR* in 50 mM potassium phosphate buffer (pH 7.0), with [KCl]+[KNO<sub>2</sub>] = 50 mM, at 10 °C. Reactions were initiated by un-caging of NADH in the dark with a laser flash photolysis excitation at 335 nm<sup>2</sup> and were tracked by following changes in the cytochrome *c* haem soret peak at 417 nm.

#### SAXS Data from the Full-Length *RpNiR* in Solution

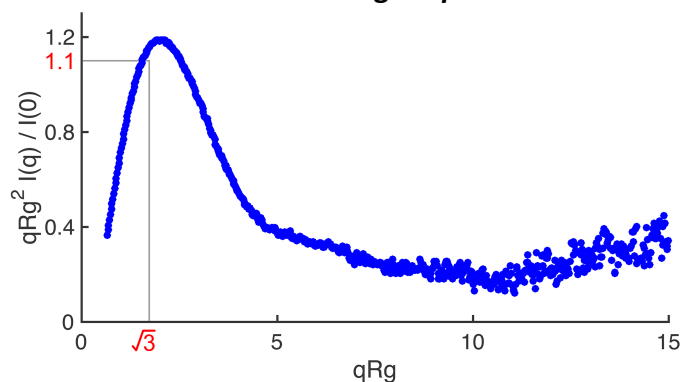

**Figure S12. Dimensionless Kratky plot of SAXS from full-length *RpNiR* in solution.** A compact protein has a maximum at  $\sqrt{3}$  and 1.1. Movement of the peak into the positive quadrant of the graph is indicative of unfolding or conformational flexibility. Data taken from <sup>3</sup>.

### Inter Copper Electron Transfer In The *Ralstonia Pickettii* Copper Containing Nitrite Reductase Core Proteins

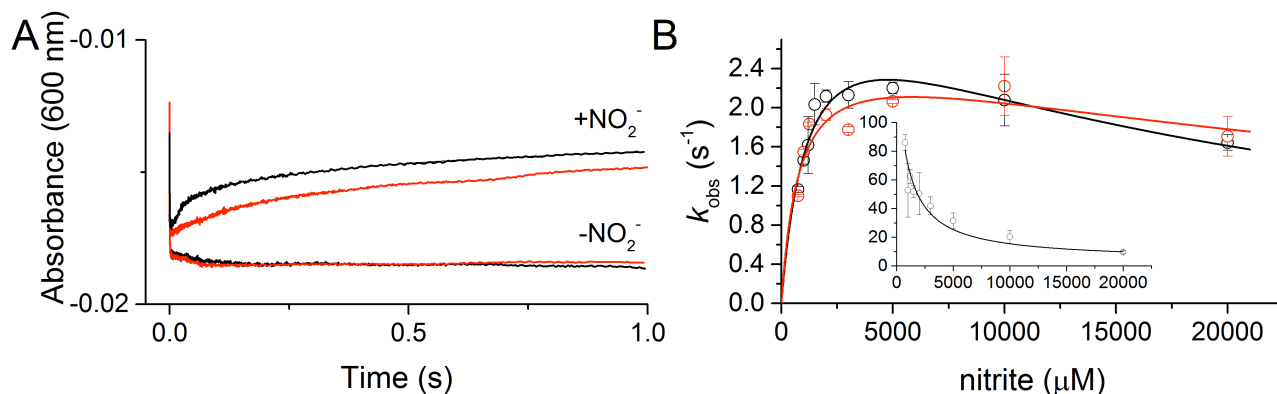

**Figure S13. Inter-copper electron transfer in the *Ralstonia pickettii* copper nitrite reductase core proteins. A)** Example transients and corresponding exponential fits for the T1Cu to T2Cu electron transfer reaction in the RpNiR-core (black) and Y323F RpNiR-core (red) constructs. **B)** Substrate dependence of T1 to T2Cu electron transfer rate in the RpNiR-core (black) and Y323F RpNiR-core constructs. The insert in B) shows the faster rate constants associated with inter-copper electron transfer in the RpNiR-core construct.

### Nitrite Affinity in the 1-Electron Reduced State of *Ralstonia Pickettii* Copper Containing Nitrite Reductase

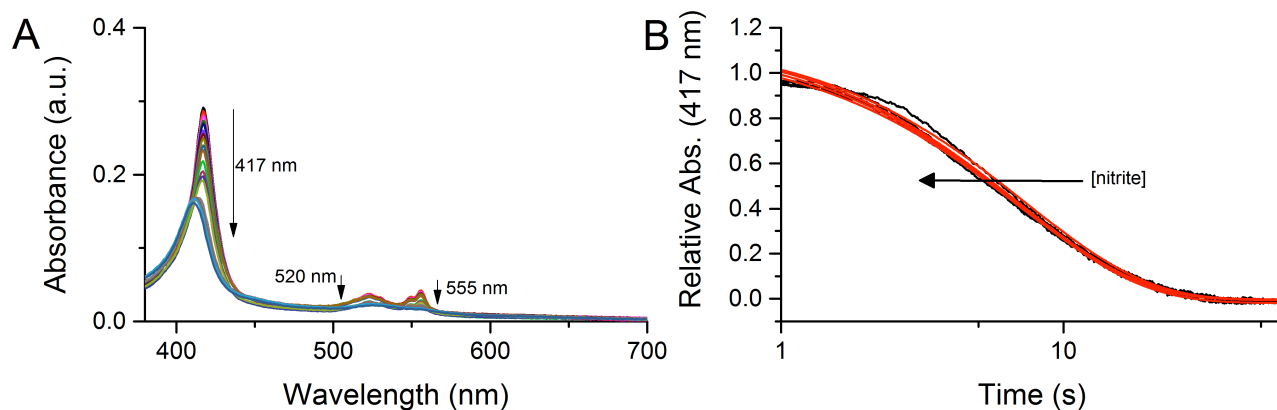

**Figure S14. A)** UV-Vis spectral changes associated with titration of 1-electron reduced RpNiR with nitrite. **B)** Example stopped-flow transients for the reaction between 1-electron reduced RpNiR and nitrite. Measurements were performed in 50 mM potassium phosphate buffer (pH 7.0), at 10 °C, with 0.5 μM (or 2 μM for spectral titration presented in A) of 1-electron reduced RpNiR and various nitrite concentrations.

## Kinetic Model Suggesting Third Site Reactivity in *Ralstonia Pickettii* Copper Containing Nitrite Reductase

Stopped-flow was used to explore the kinetics of electron transfer between the haem and the T1Cu. The stopped-flow limiting rate constant ( $k_{lim} 0.34 \pm 0.02 \text{ s}^{-1}$ ) for haem re-oxidation is one-third the value of the steady-state turnover value ( $k_{cat} 1.1 \pm 0.03 \text{ s}^{-1}$ ). This suggests only one of the three active sites in the trimer is competent in electron transfer from haem to T2Cu at any time i.e. 'one-third active site reactivity'. This one-third site reactivity might be more widely operative in CuNiR proteins as similar observations have been made in single molecule electrochemical studies of NiR activity but was considered to arise from heterogeneity of binding to the electrode.<sup>4</sup> Also, in the X-ray crystallographic structure of the AxNiR-cyt  $c_{551}$  complex only one cytochrome c protein is found associated with the core CuNiR protein (Figure 1A).<sup>5</sup> It has been argued that this is attributed to crystal packing. Our findings with RpNiR might also suggest a role for fractional reactivity in the observed stoichiometry of the AxNiR-cyt  $c_{551}$  complex. See below for kinetic model:

The reaction can be modelled as a sequential 3-step irreversible reaction:

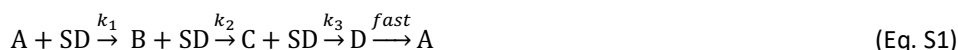

Where A, B, C and D are the fully reduced ( $\text{Fe(II)}_3$ ),  $\text{Fe(II)}_2/\text{Fe(III)}$ ,  $\text{Fe(II)}/\text{Fe(III)}_2$ , and fully oxidized species, respectively and SD is sodium dithionite.

The rate of sodium dithionite consumption is then described by:

$$\frac{d}{dt} [\text{SD}] = -k_1 [\text{A}][\text{SD}] - k_2 [\text{B}][\text{SD}] - k_3 [\text{C}][\text{SD}] \quad (\text{Eq. S2})$$

This directly describes the reaction velocity described under steady-state conditions. However, in the steady state assay,  $V_{max}$  is independent of [SD], so each step in Eq. S1 is effectively first order. Consequently:

$$\frac{d}{dt} [\text{SD}] = -k_1' [\text{A}] - k_2' [\text{B}] - k_3' [\text{C}] \quad (\text{Eq. S3})$$

As the concentration of each monomer in the trimer is the same,  $[\text{A}] = [\text{B}] = [\text{C}] = [\text{monomer}]$ :

$$\frac{d}{dt} [\text{SD}] = -(k_1' + k_2' + k_3') [\text{monomer}] \quad (\text{Eq. S4})$$

Finally, if the active sites are equivalent, then  $k_1' = k_2' = k_3'$  and:

$$\frac{d}{dt} [\text{SD}] = -3k_1' [\text{monomer}] \quad (\text{Eq. S5})$$

If the stopped-flow experiments report on  $k_1'$ , then the observed rate constants will be 1/3 that observed under steady state turnover conditions.

## References

- (1) Robert, X.; Gouet, P. Deciphering Key Features in Protein Structures with the New ENDscript Server. *Nucleic Acids Res.* **2014**, *42*, W320–W324.
- (2) Leferink, N. G. H.; Han, C.; Antonyuk, S. V.; Heyes, D. J.; Rigby, S. E. J.; Hough, M. A.; Eady, R. R.; Scrutton, N. S.; Hasnain, S. S. Proton-Coupled Electron Transfer in the Catalytic Cycle of *Alcaligenes Xylooxidans* Copper-Dependent Nitrite Reductase. *Biochemistry* **2011**, *50*, 4121–4131.
- (3) Han, C.; Wright, G. S. A.; Fisher, K.; Rigby, S. E. J.; Eady, R. R.; Samar Hasnain, S. Characterization of a Novel Copper-Haem c Dissimilatory Nitrite Reductase from *Ralstonia Pickettii*. *Biochem. J* **2012**, *444*, 219–226.
- (4) Krzemiński, Ł.; Ndamba, L.; Canters, G. W.; Aartsma, T. J.; Evans, S. D.; Jeuken, L. J. C. Spectroelectrochemical Investigation of Intramolecular and Interfacial Electron-Transfer Rates Reveals Differences between Nitrite Reductase at Rest and during Turnover. *J. Am. Chem. Soc.* **2011**, *133*, 15085–15093.
- (5) Nojiri, M.; Koteishi, H.; Nakagami, T.; Kobayashi, K.; Inoue, T.; Yamaguchi, K.; Suzuki, S. Structural Basis of Inter-Protein Electron Transfer for Nitrite Reduction in Denitrification. *Nature* **2009**, *462*, 117–120.
